# Supplementary material for: Structural study and electrical conductivity of salts based on functionalized TTF containing peripheral selenium atoms
Source: Royal Society of Chemistry journal article supplement (doi:10.1039/b308514g), 2004-01-01
Supplement: b308514g.pdf [file b308514g.pdf]

**Table 6** : Selected torsion angles (°) for **Ie**, **Id**, **Ic**, and **(Ic)<sub>2</sub>-TCNQ** (e.s.d.'s in parentheses). A positive angle is a clockwise rotation from atom 1 to atom 4, when viewed from atom 2 to atom 3.

| Torsion angles                | <b>Ie</b> | <b>Id</b> | <b>Ic</b> | <b>(Ic)<sub>2</sub>-TCNQ</b> |
|-------------------------------|-----------|-----------|-----------|------------------------------|
| C(10) - O(1) - C(13) - C(14)  | 178.8(2)  | 176.4(5)  | -177.9(3) | 178.5(7)                     |
| C(10) - O(1) - C(13) - O(2)   | -1.6(4)   | -3.5(1.2) | 2.0(5)    | -1.8(1.3)                    |
| C(13) - O(1) - C(10) - C(9)   | -51.1(3)  | -120.6(7) | 103.4(4)  | 122.5(8)                     |
| C(13) - O(1) - C(10) - C(11)  | 135.2(2)  | 64.2(9)   | -79.8(4)  | -62.9(1.1)                   |
| C(17) - Se(1) - C(1) - S(1)   | -         | 114.7(3)  | -141.4(2) | 141.7(5)                     |
| C(17) - Se(1) - C(1) - C(2)   | -         | -64.0(5)  | 34.8(3)   | -37.0(9)                     |
| C(1) - Se(1) - C(17) - C(16)  | -         | -         | -7.2(4)   | 15.0(9)                      |
| C(1) - Se(1) - C(17) - C(18)  | -         | 78.7(5)   | -         | -                            |
| C(16) - Se(2) - C(2) - S(2)   | -         | -113.3(3) | 124.2(2)  | -134.2(5)                    |
| C(16) - Se(2) - C(2) - C(1)   | -         | 63.6(5)   | -46.9(3)  | 41.4(9)                      |
| C(2) - Se(2) - C(16) - C(17)  | -         | -         | 71.1(3)   | -60.4(8)                     |
| C(2) - Se(2) - C(16) - C(18)  | -         | -82.9(5)  | -         | -                            |
| Se(2) - C(16) - C(17) - Se(1) | -         | -         | -45.4(4)  | 33.3(1.1)                    |
| Se(2) - C(16) - C(18) - C(17) | -         | 77.0(7)   | -         | -                            |
| Se(1) - C(17) - C(18) - C(16) | -         | -73.5(7)  | -         | -                            |
| C(1) - C(2) - C(16) - C(17)   | 0.9(3)    | -         | -         | -                            |
| C(2) - C(16) - C(17) - C(18)  | -0.8(4)   | -         | -         | -                            |
| C(16) - C(17) - C(18) - C(19) | 0.3(4)    | -         | -         | -                            |
| C(17) - C(18) - C(19) - C(1)  | 0.0(4)    | -         | -         | -                            |
